# Supplementary material for: mTOR Inhibitor Rapalink-1 Prevents Ethanol-Induced Senescence in Endothelial Cells
Source: MDPI journal article supplement (doi:10.3390/cells12222609), 2023-11-11
Supplement: s1 [file s1]

**Table S1.** Primary and Secondary antibodies.

| Antibody                                                   | MW(kDa) | Brand          | Catalog Number | Concentration |
|------------------------------------------------------------|---------|----------------|----------------|---------------|
| P21                                                        | 21      | Cell Signaling | # 2947S        | 1:1,000       |
| Lamin B1                                                   | 66      | Abcam          | ab16048        | 0.1 µg/mL     |
| KU80                                                       | 86      | Cell Signaling | #2753S         | 1:1,000       |
| Ku70                                                       | 70      | Cell Signaling | #4588S         | 1:1,000       |
| P65                                                        | 65      | Cell Signaling | #6956S         | 1:1,000       |
| p-P65                                                      | 65      | Cell Signaling | #3033S         | 1:1,000       |
| MMP-2                                                      | 70      | Invitrogen     | 436000         | 2 µg/mL       |
| β-actin (Rabbit)                                           | 45      | Cell Signaling | #4970S         | 1:1,000       |
| β-actin (Mouse)                                            | 45      | Invitrogen     | #MA5-15739     | 1:1,000       |
| p-P38                                                      | 43      | Cell Signaling | #4511S         | 1:1,000       |
| p-JNK                                                      | 46,54   | Cell Signaling | #9255S         | 1:2,000       |
| p-ERK                                                      | 42,44   | Cell Signaling | #4370S         | 1:2,000       |
| p-mTOR                                                     | 289     | Cell Signaling | #2971S         | 1:1,000       |
| p-S6                                                       | 32      | Cell Signaling | #2215S         | 1:1,000       |
| p-4EBP1                                                    | 15-20   | Cell Signaling | #2855S         | 1:1,000       |
| 8-OHdG                                                     |         | BIOSS          | BSS-BS-1278R   | 1:500         |
| Alexa Fluor Plus 488                                       |         | Cell signaling | 4408           | 1:1,000       |
| Alexa Fluor 594                                            |         | Cell signaling | 8889           | 1:1,000       |
| IRDye 800CW Goat-<br>anti-Rabbit Antibody                  |         | LiCor          | #926-32211     | 1:10,000      |
| IRDye 680RD Donkey<br>anti-Mouse IgG<br>Secondary Antibody |         | LiCor          | #926-68072     | 1:10,000      |

**Table S2.** Primer list.

| Target gene | Gene Accession Number                                                                                                                                           | Sense 5' -3'            | Antisense 5' -3'         |
|-------------|-----------------------------------------------------------------------------------------------------------------------------------------------------------------|-------------------------|--------------------------|
| ICAM-1      | NM_000201                                                                                                                                                       | CACAGTCACCTATGGCAACGA   | TGGCTTCGTCAGAATCACGTT    |
| VCAM-1      | NM_080682,<br>NM_001199834,<br>NM_001078                                                                                                                        | AGTGGTGGCCTCCTGAATGG    | CTGTGTCTCCTGTCTCCGCT     |
| IL-8        | NM_001354840,<br>NM_000584                                                                                                                                      | TGCCAAGGAGTGCTAAAG      | CTCCACAACCCTCTGCAC       |
| MCP-1       | NM_002982                                                                                                                                                       | CACCAATAGGAAGATCTCAGTGC | TGAGTGTTCAAGTCTTCGGAGTT  |
| MMP2        | NM_001302510,<br>NM_001302509,<br>NM_001127891,<br>NM_004530,<br>NM_001302508                                                                                   | ATAACCTGGATGCCGTCGT     | AGGCACCCTTGAAGAAGTAGC    |
| TIMP1       | NM_003254                                                                                                                                                       | TGGCTTCTGGCATCCTGTTGTTG | CGCTGGTATAAGGTGGTCTGGTTG |
| TIMP2       | NM_003255                                                                                                                                                       | GAATCGGTGAGGTCCTGTCCTGA | CCTGCACACAAGCCCGGATAAA   |
| E-selectin  | NM_000450                                                                                                                                                       | CAAGAAGAAGCTTGCCCTATG   | ACTTGAGTCCACTGAAGCCA     |
| P21         | NM_001374511,<br>NM_001220777,<br>NM_001374510,<br>NM_001374512,<br>NM_001374513,<br>NM_001291549,<br>NM_078467,<br>NM_001374509,<br>NM_001220778,<br>NM_000389 | GACACCACTGGAGGGTGACT    | CAGGTCCACATGGTCTTCCT     |
